# Supplementary material for: HIV Care clinic Services in Post-Conflict Tigray, North Ethiopia: Client Perceptions and Health System Challenges
Source: Research Square preprint supplement (doi:10.21203/rs.3.rs-7642520/v1), 2025-10-17
Supplement: Supplementary file 1 [file a3d7aedcc179ed688aedac5c.docx]

# **Supplementary Files**

**Supplementary file 1:** Socio-demographic, clinical, and facility-related characteristics of PLWH attending ART clinics in post-war Mekelle City, Tigray, 2024 (n = 521)

| **Variable** | **Category** | **Frequency (N)** | **Percent (%)** |
| --- | --- | --- | --- |
| Age (yrs.) | 18–29 | 45 | 8.64 |
| 30–49 | 349 | 66.99 |
| 50+ | 127 | 24.38 |
| Gender | Male | 205 | 39.35 |
| Female | 316 | 60.65 |
| Marital Status | Never married | 79 | 15.16 |
| Married | 279 | 53.55 |
| Divorced/Other | 163 | 31.29 |
| Education Level | Never Attended School | 76 | 14.59 |
| Primary School | 201 | 38.58 |
| Secondary School | 153 | 29.37 |
| College Diploma+ | 91 | 17.47 |
| Employment Status | Gov/Private Employed | 144 | 27.64 |
| Does not work | 65 | 12.48 |
| Self-Employed | 158 | 30.33 |
| Housewife | 90 | 17.27 |
| Other | 64 | 12.28 |
| Residence | Mekelle City | 446 | 85.60 |
| Other | 75 | 14.40 |
| ART Duration | <= 5 years | 106 | 20.35 |
| 5–10 years | 219 | 42.03 |
| >10 years | 196 | 37.62 |
| Level of care | Primary | 308 | 59.12 |
| Secondary | 141 | 27.06 |
| Tertiary | 72 | 13.82 |
| Managing Authority | Public | 414 | 79.46 |
| Private | 107 | 20.54 |

**Supplementary file 2:** Factor loadings of confirmatory factor analysis (CFA) for patient satisfaction with HIV care services in specialized HIV clinics, Mekelle City, Tigray (2024)

| **Latent Variable** | **Indicator** | **β** | **p-value** | **R2** |
| --- | --- | --- | --- | --- |
| Provider Responsiveness & Communication (PRC) | PRC1 | 0.917 |  | 0.841 |
| PRC2 | 0.914 |  | 0.835 |
| PRC5 | 0.841 |  | 0.707 |
| Availability & Accessibility of Care (AAC) | AAC1 | 0.882 |  | 0.777 |
| AAC3 | 0.722 |  | 0.521 |
| AAC4 | 0.609 |  | 0.370 |
| Quality of Counseling & Support (QCS) | QCS1 | 0.854 |  | 0.730 |
| QCS3 | 0.880 |  | 0.775 |
| QCS4 | 0.869 |  | 0.756 |
| Facility & Service Environment (FSE) | FSE3 | 0.848 |  | 0.719 |
| FSE4 | 0.882 |  | 0.778 |
| FSE5 | 0.771 |  | 0.594 |

**Supplementary file 3**: Factor loadings of SEM for patient satisfaction with HIV care services in specialized HIV clinics, Mekelle City, Tigray (2024)

| **Construct** | **Indicators** | **β (95% CI)** | **p-value** | **R2** |
| --- | --- | --- | --- | --- |
| Provider Responsiveness & Communication (PRC) | PRC1 | 0.919 (0.933-1.0) | <0.001 | 0.845 |
| PRC2 | 0.916 (0.933-1.05) | 0.001 | 0.839 |
| PRC5 | 0.855 (0.862-1.02) | 0.001 | 0.731 |
| Availability & Accessibility of Care (AAC) | AAC1 | 0.884 (0.717-0.91) | 0.001 | 0.781 |
| AAC3 | 0.731([0.563-0.76) | 0.001 | 0.535 |
| AAC4 | 0.601 (0.717-0.91) | 0.001 | 0.361 |
| Quality of Counseling & Support (QCS) | QCS1 | 0.862 (0.944-1.13) | 0.001 | 0.743 |
| QCS3 | 0.884 (0.862-1.04) | 0.001 | 0.781 |
| QCS4 | 0.872 (0.932-1.12) | 0.001 | 0.760 |
| Facility & Service Environment (FSE) | FSE3 | 0.853 (0.994-1.15) | 0.001 | 0.728 |
| FSE4 | 0.897 (0.847-0.99) | 0.001 | 0.804 |
| FSE5 | 0.780 (0.921-1.10) | 0.001 | 0.609 |

**Supplementary file 4:** Summary of client characteristics by satisfaction levels for each construct HIV care services in specialized clinics, Mekelle City, Tigray (2024)

| **Variable** | **Category** | **Latent Factors** | | | | | | | | | |
| --- | --- | --- | --- | --- | --- | --- | --- | --- | --- | --- | --- |
| **Overall Satisfaction** | | **Provider-Client Relationship (PRC)** | | **Availability and Accessibility of Care (AAC)** | | **Quality of Care Services (QCS)** | | **Facility Service Environment (FSE)** | |
| **DS (%)** | **SA(%)** | **DS (%)** | **SA(%)** | **DS (%)** | **SA(%)** | **DS (%)** | **SA(%)** | **DS (%)** | **SA(%)** |
| Total 521 | | 193 (37.04) | 328 (62.96) | 185(35.5) | 336 (64.5) | 357 (68.5) | 164 (31.5) | 223 (42.8) | 298 (57.2) | 222 (42.6) | 299 (57.4) |
| Age (yrs.) | 18–29 | 14 (7.25) | 31 (9.45) | 15 (8.11) | 30 (8.93) | 28 (07.84) | 17 (10.40) | 21 (09.42) | 24 (08.05) | 15 (6.76) | 30 (10.00) |
| 30–49 | 130 (67.36) | 219 (66.77) | 124 (67.00) | 225 (67.00) | 239 (66.90) | 110 (67.10) | 142 (63.70) | 207 (69.50) | 154 (69.40) | 195 (65.20) |
| 50+ | 49 (25.39) | 78 (23.78) | 46 (24.90) | 81 (24.10) | 90 (25.20) | 37 (22.60) | 60 (26.90) | 67 (22.50) | 53 (23.90) | 74 (24.70) |
| Gender | Male | 82 (42.49) | 123 (37.50) | 75 (40.50) | 130 (38.70) | 152 (42.60) | 53 (32.30) | 92 (41.30) | 113 (37.90) | 94 (42.30) | 111 (37.10) |
| Female | 111 (57.51) | 205 (62.50) | 110 (59.50) | 206 (61.30) | 205 (57.40) | 111 (67.70) | 131 (58.70) | 185 (62.10) | 128 (57.70) | 188 (62.90) |
| Marital Status | Never married | 28 (14.51) | 51 (15.55) | 27 (14.60) | 52 (15.50) | 53 (14.80) | 26 (15.90) | 35 (15.70) | 44 (14.80) | 29 (13.10) | 50 (16.70) |
| Married | 102 (52.85) | 177 (53.96) | 105 (56.80) | 174 (51.80) | 192 (53.80) | 87 (53.00) | 117 (52.50) | 162 (54.40) | 130 (58.60) | 149 (49.80) |
| Divorced/Other | 63 (32.64) | 100 (30.49) | 53 (28.60) | 110 (32.70) | 112 (31.40) | 51 (31.10) | 71 (31.80) | 92 (30.90) | 63 (28.40) | 100 (33.40) |
| Education Level | Never Attended School | 25 (12.95) | 51 (15.55) | 20 (10.80) | 54 (15.10) | 54 (15.10) | 22 (13.40) | 29 (13.00) | 47 (15.80) | 28 (12.60) | 48 (16.10) |
| Primary School | 81 (41.97) | 120 (36.59) | 73 (39.50) | 128 (38.10) | 148 (41.50) | 53 (32.30) | 86 (38.60) | 115 (38.60) | 88 (39.60) | 113 (37.80) |
| Secondary School | 58 (30.05) | 95 (28.96) | 58 (31.40) | 95 (28.30) | 98 (27.50) | 55 (33.50) | 72 (32.30) | 81 (27.20) | 63 (28.40) | 90 (30.10) |
| College Diploma+ | 29 (15.03) | 62 (18.90) | 34 (18.40) | 57 (17.00) | 57 (16.00) | 34 (20.70) | 36 (16.10) | 55 (18.50) | 43 (19.40) | 48 (16.10) |
| Employment Status | Gov/Private Employed | 49 (25.39) | 95 (28.96) | 54 (29.20) | 90 (26.80) | 88 (24.60) | 56 (34.10) | 60 (26.90) | 84 (28.20) | 63 (28.40) | 81 (27.10) |
| Does not work | 30 (15.54) | 35 (10.67) | 23 (12.40) | 42 (12.50) | 48 (13.40) | 17 (10.40) | 34 (15.20) | 31 (10.40) | 28 (12.60) | 37 (12.40) |
| Self-Employed | 49 (25.39) | 109 (33.23) | 52 (28.10) | 106 (31.50) | 107 (30.00) | 51 (31.10) | 65 (29.10) | 93 (31.20) | 57 (25.70) | 101 (33.80) |
| Housewife | 33 (17.10) | 57 (17.38) | 32 (17.30) | 58 (17.30) | 56 (15.70) | 34 (20.70) | 36 (16.10) | 54 (18.10) | 41 (18.50) | 49 (16.40) |
| Other | 32 (16.58) | 32 (9.76) | 24 (13.00) | 40 (11.90) | 58 (16.20) | 6 (03.66) | 28 (12.60) | 36 (12.10) | 33 (14.90) | 31 (10.40) |
| Residence | Mekelle City | 166 (86.01) | 280 (85.37) | 161 (87.00) | 285 (84.80) | 299 (83.80) | 147 (89.60) | 192 (86.10) | 254 (85.20) | 195 (87.80) | 251 (83.90) |
| Other | 27 (13.99) | 48 (14.63) | 24 (13.00) | 51 (15.20) | 58 (16.20) | 17 (10.40) | 31 (13.90) | 44 (14.80) | 27 (12.20) | 48 (16.10) |
| ART Duration | <= 5 years | 40 (20.73) | 66 (20.12) | 45 (24.30) | 61 (18.20) | 73 (20.40) | 33 (20.10) | 47 (21.10) | 59 (19.80) | 49 (22.10) | 57 (19.10) |
| 5–10 years | 77 (39.90) | 142 (43.29) | 69 (37.30) | 150 (44.60) | 143 (40.10) | 76 (46.30) | 87 (39.00) | 132 (44.30) | 87 (39.20) | 132 (44.10) |
| >10 years | 76 (39.38) | 120 (36.59) | 71 (38.40) | 125 (37.20) | 141 (39.50) | 55 (33.50) | 89 (39.90) | 107 (35.90) | 86 (38.70) | 110 (36.80) |
| Level of care | Primary | 104 (53.89) | 204 (62.20) | 108 (58.38) | 200 (59.52) | 170 (47.60) | 138 (84.10) | 113 (50.70) | 195 (65.40) | 122 (55.00) | 186 (62.20) |
| Secondary | 44 (22.80) | 97 (29.57) | 39 (21.08) | 102 (30.36) | 123 (34.50) | 18 (11.00) | 67 (30.00) | 74 (24.80) | 60 (27.00) | 81 (27.10) |
| Tertiary | 45 (23.32) | 27 (8.23) | 38 (20.54) | 34 (10.12) | 64 (17.90) | 8 (04.88) | 43 (19.30) | 29 (09.73) | 40 (18.00) | 32 (10.70) |
| Managing Authority | Public | 138 (71.50) | 276 (84.15) | 135 (73.00) | 279 (83.00) | 289 (81.00) | 125 (76.20) | 170 (76.20) | 244 (81.90) | 165 (74.30) | 249 (83.30) |
| Private | 55 (28.50) | 52 (15.85) | 50 (27.00) | 57 (17.00) | 68 (19.00) | 39 (23.80) | 53 (23.80) | 54 (18.10) | 57 (25.70) | 50 (16.70) |

**DS**= Dissatisfied, **SA**= Satisfied

**Supplementary file 5:** Predictors of HIV care service satisfaction among patients in specialized HIV clinics, post-war Mekelle City, Tigray (2024)

| **Predictor** | **Category** | **Estimate** | **Std. Error** | **z-value** | **p-value** | **Odds Ratio (95% CI)** |
| --- | --- | --- | --- | --- | --- | --- |
| Intercept | | 1.75 | 0.89 | 1.97 | 0.0493* | 5.75 (1.02, 33.60) |
| Level of Care | Primary | **Ref.** |  |  |  |  |
| Higher-tier | -0.70 | 0.15 | -4.63 | <0.001*** | 0.50 (0.37, 0.67) |
| Managing Authority | Private | **Ref.** |  |  |  |  |
| Public | -0.45 | 0.09 | -5.14 | <0.001*** | 0.64 (0.54, 0.76) |
| Age | 18–29 | **Ref.** |  |  |  |  |
| 30–49 | -0.37 | 0.43 | -0.85 | 0.39 | 0.69 (0.29, 1.58) |
| 50+ | -0.26 | 0.49 | -0.54 | 0.59 | 0.77 (0.29, 1.97) |
| Gender | Male | Ref. |  |  |  |  |
| Female | 0.27 | 0.26 | 1.05 | 0.29 | 1.31 (0.79, 2.18) |
| Residence | Other | Ref. |  |  |  |  |
| Mekelle City | 0.25 | 0.29 | 0.88 | 0.38 | 1.29 (0.74, 2.30) |
| Marital Status | Divorced & others | Ref. |  |  |  |  |
| Married | 0.16 | 0.27 | 0.61 | 0.54 | 1.18 (0.69, 2.01) |
| Never married | 0.12 | 0.38 | 0.32 | 0.75 | 1.13 (0.54, 0.39) |
| Education | Collage diploma+ | Ref. |  |  |  |  |
| Never attended school | -0.31 | 0.41 | -0.75 | 0.45 | 0.73 (0.32, 1.65) |
| Primary school | -0.42 | 0.32 | -1.32 | 0.19 | 0.65 (0.35, 1.22) |
| Secondary school | -0.28 | 0.31 | -0.92 | 0.36 | 0.75 (0.41, 1.38) |
| Employment | Does not work | Ref. |  |  |  |  |
| Government/Private | 0.22 | 0.36 | 0.62 | 0.53 | 1.25 (0.61, 2.55) |
| Housewife | 0.19 | 0.42 | 0.46 | 0.64 | 1.21 (0.53, 2.77) |
| Self-employed | 0.49 | 0.34 | 1.45 | 0.15 | 1.63 (0.84, 3.14) |
| Other | -0.10 | 0.39 | -0.25 | 0.80 | 0.91 (0.42, 1.94) |
| ART Length | **<**=5 years | Ref. |  |  |  |  |
| 5–10 years | 0.34 | 0.28 | 1.23 | 0.22 | 1.41 (0.82, 2.43) |
| >10 years | 0.11 | 0.30 | 0.36 | 0.72 | 1.11 (0.62, 2.01) |

Abbreviations: CI = Confidence Interval, OR = Odds Ratio ‘***’ <0.001, ‘**’ <0.01, ‘*’ <0.05

**Supplementary file 6: Operational definitions**

**Patient Satisfaction:** was defined as each client’s perception of how well the HIV care clinic services met their needs and expectations during the past 12 months of ART care. It was influenced by various dimensions of service quality, including accessibility, staff attitude, clarity of communication, timeliness, and the physical service environment.

**HIV Care Client Experience:** referred to the totality of interactions a client had with the HIV care system at a health facility over a minimum of 12 months. This encompassed patient-centered care, communication with staff, perceived safety, and provider responsiveness, factors that collectively shape satisfaction.

**Satisfaction Level:** was assessed using a composite mean score derived from Likert-scale responses (1 = Extremely Dissatisfied to 5 = Extremely Satisfied) across multiple satisfaction indicators. A mean score greater than 3.69 was classified as “Satisfied,” while scores of 3.69 or below were categorized as “Dissatisfied.”

**Other Variables:** included self-reported socio-demographic and clinical characteristics such as age, gender, marital status, educational level, place of residence, ART duration, and frequency of follow-up appointments. These variables were examined for their association with satisfaction and were incorporated into the structural equation modeling framework.
